# Supplementary material for: Exploring trust in religious leaders and institutions as a mechanism for improving retention in child malnutrition interventions in the Philippines: a retrospective cohort study
Source: PubMed Central journal article supplement — BMJ Open. 2020 Sep 2;10(9):e036091. doi: 10.1136/bmjopen-2019-036091 (PMC7470639; doi:10.1136/bmjopen-2019-036091), 2020-09-02
Supplement: bmjopen-2019-036091supp001.pdf [file bmjopen-2019-036091supp001.pdf]

## Supplementary Materials

### Appendix 1. ICM Survey Form v3.3

ICM Survey Form v3.3 was the survey instrument used to interview program participants before and after the intervention. The interviews were conducted by part-time enumerators hired by ICM's Research Department, trained on data collection practices and survey conduct. These enumerators are separate from the program delivery team, with minimal to no interaction.

**INTERNATIONAL CARE MINISTRIES FOUNDATION, INC.**  
**Program Survey Form**

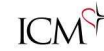

Pastor  Counselor  Participant  Jumpstart  MCO

Date: \_\_\_\_\_ Time: \_\_\_\_\_

Name: (Last, First MI) \_\_\_\_\_

Mobile No.: \_\_\_\_\_

Recipient No.:

|        |           |         |             |               |                                                                                     |                                    |
|--------|-----------|---------|-------------|---------------|-------------------------------------------------------------------------------------|------------------------------------|
| Btag # | Program # | Batch # | Community # | Participant # | 1: Bacolod, 2: Bohol, 3: Dumaguete, 4: GenSan, 5: Koronadal, 6: El Nido, 7: Dipolog | 1: Transform, 2: Jumpstart, 3: MCO |
|--------|-----------|---------|-------------|---------------|-------------------------------------------------------------------------------------|------------------------------------|

Hello. My name is \_\_\_\_\_, and I am working with International Care Ministry of the Philippines (ICMPI). We are conducting a survey about various health and livelihood issues. We would very much appreciate your participation in this survey. The survey usually takes between 30 and 45 minutes to complete. The purpose of this survey is for ICMPPI to measure the impact of the program you have been selected to join. It is a two part survey: the .pre<sup>m</sup> and the .post<sup>m</sup>. Which means the before program survey and the after program survey. Today it will be the Pre survey / Post survey (chose the correct one). ICMPPI uses this information to inform sponsors and donors about the activities of ICM, but most importantly these survey's help ICMPPI to improve the programs that they offer and help teach ICMPPI about how better to conduct their programs. The interview is completely confidential and your responses will only be analysed together with all the others. No one will find out how you answered and your answers will not have any impact on the benefits that you receive so please answer honestly.

At this time, do you want to ask me anything about the survey?

First we will collect information about your household. Can I start by asking about the people who are 16 years old & above in your household:

| Line/ID Number              | Q1: Starting with the participant, please give me the names of the adults (over 16) who usually live here and eat with you. | Q2: What is the highest grade he or she has completed? | Q3: What is the age of each person? | Q4: Is each person male or female? | Q5: What is each person's marital status?<br><i>(For questions 5-7, please fill up only for adults aged 16 to 65)</i> |         |           |         |        |       |     |    |     |    | Q6: Does he or she have a birth certificate at home? |  | Q7: Does he or she have a marriage certificate at home? |  |
|-----------------------------|-----------------------------------------------------------------------------------------------------------------------------|--------------------------------------------------------|-------------------------------------|------------------------------------|-----------------------------------------------------------------------------------------------------------------------|---------|-----------|---------|--------|-------|-----|----|-----|----|------------------------------------------------------|--|---------------------------------------------------------|--|
|                             |                                                                                                                             |                                                        |                                     |                                    | 1                                                                                                                     | 2       | 3         | 4       | 5      | 6     | 1   | 2  | 1   | 2  |                                                      |  |                                                         |  |
| Adult1                      |                                                                                                                             |                                                        |                                     | M F                                | Married                                                                                                               | Live-in | Separated | Widowed | Single | Other | Yes | No | Yes | No |                                                      |  |                                                         |  |
| A2                          |                                                                                                                             |                                                        |                                     | M F                                | Married                                                                                                               | Live-in | Separated | Widowed | Single | Other | Yes | No | Yes | No |                                                      |  |                                                         |  |
| A3                          |                                                                                                                             |                                                        |                                     | M F                                | Married                                                                                                               | Live-in | Separated | Widowed | Single | Other | Yes | No | Yes | No |                                                      |  |                                                         |  |
| A4                          |                                                                                                                             |                                                        |                                     | M F                                | Married                                                                                                               | Live-in | Separated | Widowed | Single | Other | Yes | No | Yes | No |                                                      |  |                                                         |  |
| A5                          |                                                                                                                             |                                                        |                                     | M F                                | Married                                                                                                               | Live-in | Separated | Widowed | Single | Other | Yes | No | Yes | No |                                                      |  |                                                         |  |
| A6                          |                                                                                                                             |                                                        |                                     | M F                                | Married                                                                                                               | Live-in | Separated | Widowed | Single | Other | Yes | No | Yes | No |                                                      |  |                                                         |  |
| A7                          |                                                                                                                             |                                                        |                                     | M F                                | Married                                                                                                               | Live-in | Separated | Widowed | Single | Other | Yes | No | Yes | No |                                                      |  |                                                         |  |
| A8                          |                                                                                                                             |                                                        |                                     | M F                                | Married                                                                                                               | Live-in | Separated | Widowed | Single | Other | Yes | No | Yes | No |                                                      |  |                                                         |  |
| <b>AVERAGE (AGE)/TOTAL:</b> |                                                                                                                             |                                                        |                                     |                                    |                                                                                                                       |         |           |         |        |       |     |    |     |    |                                                      |  |                                                         |  |

Just to make sure that I have a complete listing, are there any other people who may not be members of your family, such as domestic help, lodgers, or friends who usually live here?  IF "YES", ADD TO FIRST TABLE

Now, I'd like to ask about the children who are 15 years old and younger that live in the household:

**NOTE: For Jumpstart recipient kindly fill up the first column to indicate that the child is a Jumpstart recipient.**

| Line/ID Number                      | Q8: Please give me the names of the children (15 years old and below) who usually live here and eat with you. | Q9: How old is each person (in years)? | Q10: what is the highest grade he or she completed | Q11: Is each person male or female? | Q12: Is each child currently enrolled in school? | Q13: Does each child receive a scholarship? | Q14: What type of school does each child attend? |            |         |
|-------------------------------------|---------------------------------------------------------------------------------------------------------------|----------------------------------------|----------------------------------------------------|-------------------------------------|--------------------------------------------------|---------------------------------------------|--------------------------------------------------|------------|---------|
|                                     |                                                                                                               |                                        |                                                    |                                     |                                                  |                                             | 1                                                | 2          | 3       |
| Jumpstart                           |                                                                                                               |                                        |                                                    | M F                                 | Yes No                                           | Yes No                                      | ICM                                              | Government | Private |
| MCO                                 |                                                                                                               |                                        |                                                    | M F                                 | Yes No                                           | Yes No                                      | ICM                                              | Government | Private |
| Child 1                             |                                                                                                               |                                        |                                                    | M F                                 | Yes No                                           | Yes No                                      | ICM                                              | Government | Private |
| C2                                  |                                                                                                               |                                        |                                                    | M F                                 | Yes No                                           | Yes No                                      | ICM                                              | Government | Private |
| C3                                  |                                                                                                               |                                        |                                                    | M F                                 | Yes No                                           | Yes No                                      | ICM                                              | Government | Private |
| C4                                  |                                                                                                               |                                        |                                                    | M F                                 | Yes No                                           | Yes No                                      | ICM                                              | Government | Private |
| C5                                  |                                                                                                               |                                        |                                                    | M F                                 | Yes No                                           | Yes No                                      | ICM                                              | Government | Private |
| C6                                  |                                                                                                               |                                        |                                                    | M F                                 | Yes No                                           | Yes No                                      | ICM                                              | Government | Private |
| C7                                  |                                                                                                               |                                        |                                                    | M F                                 | Yes No                                           | Yes No                                      | ICM                                              | Government | Private |
| C8                                  |                                                                                                               |                                        |                                                    | M F                                 | Yes No                                           | Yes No                                      | ICM                                              | Government | Private |
| C9                                  |                                                                                                               |                                        |                                                    | M F                                 | Yes No                                           | Yes No                                      | ICM                                              | Government | Private |
| C10                                 |                                                                                                               |                                        |                                                    | M F                                 | Yes No                                           | Yes No                                      | ICM                                              | Government | Private |
| <b>6 to 15 AVERAGE (AGE)/TOTAL:</b> |                                                                                                               |                                        |                                                    |                                     |                                                  |                                             |                                                  |            |         |
| <b>0 to 5 AVERAGE (AGE)/TOTAL:</b>  |                                                                                                               |                                        |                                                    |                                     |                                                  |                                             |                                                  |            |         |

Note: If the child is a Jumpstart recipients use the table labelled as "Jumpstart for his/her data & for an MCO recipient use the table labelled as "MCO" as well.

|                                                                                                                                                                 |                                                                                                                                                                       | 1                    | 2                                              | 3                                                        | 4                                                                                          | 5                                       |
|-----------------------------------------------------------------------------------------------------------------------------------------------------------------|-----------------------------------------------------------------------------------------------------------------------------------------------------------------------|----------------------|------------------------------------------------|----------------------------------------------------------|--------------------------------------------------------------------------------------------|-----------------------------------------|
|                                                                                                                                                                 |                                                                                                                                                                       | 0 to 5               | 6 to 12                                        | 16 to 35                                                 | 40+                                                                                        | Total                                   |
| Q15:                                                                                                                                                            | Household Count Summary: [Put in total number of people in each category]                                                                                             |                      |                                                |                                                          |                                                                                            |                                         |
| Q16:                                                                                                                                                            | Show the recipient the sentence written on the last page of this survey form. Ask them to read it out for you. If they can read it then mark "Yes", if not mark "No". | Yes                  | No                                             |                                                          |                                                                                            |                                         |
| <i>Now I would like to ask you about your relationships with other people. In particular I would like to ask you about your interactions with other people.</i> |                                                                                                                                                                       |                      |                                                |                                                          |                                                                                            |                                         |
| Q17:                                                                                                                                                            | How satisfied are you with your family life?                                                                                                                          | Not at all satisfied | Not very satisfied                             | Neutral                                                  | Somewhat satisfied                                                                         | Very Satisfied                          |
| Q18:                                                                                                                                                            | How satisfied are you with your friendships?                                                                                                                          | Not at all satisfied | Not very satisfied                             | Neutral                                                  | Somewhat satisfied                                                                         | Very Satisfied                          |
| <i>For questions 19 – 22, please indicate how much you trust the following people:</i>                                                                          |                                                                                                                                                                       |                      |                                                |                                                          |                                                                                            |                                         |
| Q19:                                                                                                                                                            | Your relatives                                                                                                                                                        | No trust             | Tentatively trust                              | Neutral                                                  | Moderately trust                                                                           | Very trusting                           |
| Q20:                                                                                                                                                            | Your neighbors                                                                                                                                                        | No trust             | Tentatively trust                              | Neutral                                                  | Moderately trust                                                                           | Very trusting                           |
| Q21:                                                                                                                                                            | Your religious leaders or church                                                                                                                                      | No trust             | Tentatively trust                              | Neutral                                                  | Moderately trust                                                                           | Very trusting                           |
| Q22:                                                                                                                                                            | Your local barangay                                                                                                                                                   | No trust             | Tentatively trust                              | Neutral                                                  | Moderately trust                                                                           | Very trusting                           |
| Q23:                                                                                                                                                            | In the last 6 months how many times have you been in a serious dispute with another person?                                                                           |                      |                                                |                                                          |                                                                                            |                                         |
| Q24:                                                                                                                                                            | In your family is there anyone currently experiencing physical abuse?                                                                                                 | Yes                  | No                                             |                                                          |                                                                                            |                                         |
| Q25:                                                                                                                                                            | (If yes to Q24) Has this problem gotten better in the last 6 months?                                                                                                  | Yes                  | No                                             |                                                          |                                                                                            |                                         |
| Q26:                                                                                                                                                            | Does anyone in your family currently have problems with substance abuse (alcohol/drugs)?                                                                              | Yes                  | No                                             |                                                          |                                                                                            |                                         |
| Q27:                                                                                                                                                            | (If yes to Q26) Has this problem gotten better in the last 6 months?                                                                                                  | Yes                  | No                                             |                                                          |                                                                                            |                                         |
| <i>Now I would like to ask you about your health and the health of other people in your household.</i>                                                          |                                                                                                                                                                       |                      |                                                |                                                          |                                                                                            |                                         |
| Q28:                                                                                                                                                            | Are you a member of Phil Health? (Select one)                                                                                                                         | Yes                  | No, because the benefits won't help my family. | No, because the benefits are too expensive.              | No, because I don't have the appropriate paperwork to enroll. (no birth certificate, etc.) | I am not familiar with Phil Health.     |
| Q29:                                                                                                                                                            | Is the female household head currently pregnant?                                                                                                                      | Yes                  | No                                             |                                                          |                                                                                            |                                         |
| <i>(If Yes to Q29, continue with questions 30-31. If No, skip to Q32.)</i>                                                                                      |                                                                                                                                                                       |                      |                                                |                                                          |                                                                                            |                                         |
| Q30:                                                                                                                                                            | If pregnant, have they been given a maternal tetanus immunization?                                                                                                    | Yes                  | No                                             |                                                          |                                                                                            |                                         |
| Q31:                                                                                                                                                            | If pregnant, whom are they attending pre-natal care? (Select all that apply)                                                                                          | Quack doctor         | Hilot (Traditional)                            | Barangay health worker/ midwife/ birthing home           | Doctor or Hospital                                                                         | No pre-natal care                       |
| Q32:                                                                                                                                                            | At the last occasion, where did the female household head give birth?                                                                                                 | Home                 | Birthing Home                                  | Hospital                                                 | Other                                                                                      |                                         |
| Q33:                                                                                                                                                            | At the last occasion the female household head gave birth was there anyone at the birth – choose only one:                                                            | Quack Doctor         | Hilot (Traditional)                            | Barangay health worker/ midwife/ birthing home           | Doctor or Hospital                                                                         | No One                                  |
| Q34:                                                                                                                                                            | At the last occasion the female household head gave birth did she received a home visit within 24 hours after delivery?                                               | Yes                  | No                                             |                                                          |                                                                                            |                                         |
| Q35:                                                                                                                                                            | If yes to Q34, who visited?                                                                                                                                           | Quack Doctor         | Hilot (Traditional)                            | Barangay health worker/ midwife/ birthing home           | Doctor                                                                                     | Other                                   |
| Q36:                                                                                                                                                            | Has the female household head ever had a baby or child die?                                                                                                           | No child has died.   | Yes, miscarriage before birth.                 | Yes, death within one month to 5 years at time of death. | Yes, aged 6-15 at time of death.                                                           | Yes, aged 16 or older at time of death. |
| Q37:                                                                                                                                                            | (If yes to question 36) How many children have died?                                                                                                                  |                      |                                                |                                                          |                                                                                            |                                         |
| Q38:                                                                                                                                                            | Which of the following do you think is the best to feed baby under 6 months of age?                                                                                   | Breast milk only     | Other milk only                                | Breast milk & other milk                                 | Breast milk & other food                                                                   |                                         |
| Q39:                                                                                                                                                            | For how long did you breast feed your youngest child before introducing any other milk or food?                                                                       | 0-3 mos.             | 4-6 mos.                                       | 7-9 mos.                                                 | 10-12 mos.                                                                                 |                                         |

|      |                                                                                                                                                                   |            |                 |           |                              |                           |
|------|-------------------------------------------------------------------------------------------------------------------------------------------------------------------|------------|-----------------|-----------|------------------------------|---------------------------|
| Q40: | What type of family planning are you using, if any? (Select only one, the most commonly use) [Let the recipient give the response without prompting the options.] | Abstinence | Natural methods | IUD       | Pill                         | Injection                 |
|      |                                                                                                                                                                   | Condom     | Ligation        | Vasectomy | Other family planning method | No family planning method |

| Line/ID Number | Q41: In the last month, does each person have an illness? |   |   |   |   |   |   |   |   |    | Q42: How does this person receive treatment (Select one common choice that apply) |   |   |   |   |   |   |   | Q43: Does each child have?<br><i>Note: Ask for children only.</i> |   |   |
|----------------|-----------------------------------------------------------|---|---|---|---|---|---|---|---|----|-----------------------------------------------------------------------------------|---|---|---|---|---|---|---|-------------------------------------------------------------------|---|---|
|                | 1                                                         | 2 | 3 | 4 | 5 | 6 | 7 | 8 | 9 | 10 | 1                                                                                 | 2 | 3 | 4 | 5 | 6 | 7 | 8 | 1                                                                 | 2 | 3 |
| Adult1         | 0                                                         | 0 | 0 | 0 | 0 | 0 | 0 | 0 | 0 | 0  | 0                                                                                 | 0 | 0 | 0 | 0 | 0 | 0 | 0 | 0                                                                 | 0 | 0 |
| A2             | 0                                                         | 0 | 0 | 0 | 0 | 0 | 0 | 0 | 0 | 0  | 0                                                                                 | 0 | 0 | 0 | 0 | 0 | 0 | 0 | 0                                                                 | 0 | 0 |
| A3             | 0                                                         | 0 | 0 | 0 | 0 | 0 | 0 | 0 | 0 | 0  | 0                                                                                 | 0 | 0 | 0 | 0 | 0 | 0 | 0 | 0                                                                 | 0 | 0 |
| A4             | 0                                                         | 0 | 0 | 0 | 0 | 0 | 0 | 0 | 0 | 0  | 0                                                                                 | 0 | 0 | 0 | 0 | 0 | 0 | 0 | 0                                                                 | 0 | 0 |
| A5             | 0                                                         | 0 | 0 | 0 | 0 | 0 | 0 | 0 | 0 | 0  | 0                                                                                 | 0 | 0 | 0 | 0 | 0 | 0 | 0 | 0                                                                 | 0 | 0 |
| A6             | 0                                                         | 0 | 0 | 0 | 0 | 0 | 0 | 0 | 0 | 0  | 0                                                                                 | 0 | 0 | 0 | 0 | 0 | 0 | 0 | 0                                                                 | 0 | 0 |
| A7             | 0                                                         | 0 | 0 | 0 | 0 | 0 | 0 | 0 | 0 | 0  | 0                                                                                 | 0 | 0 | 0 | 0 | 0 | 0 | 0 | 0                                                                 | 0 | 0 |
| A8             | 0                                                         | 0 | 0 | 0 | 0 | 0 | 0 | 0 | 0 | 0  | 0                                                                                 | 0 | 0 | 0 | 0 | 0 | 0 | 0 | 0                                                                 | 0 | 0 |
| Jumpstart      | 0                                                         | 0 | 0 | 0 | 0 | 0 | 0 | 0 | 0 | 0  | 0                                                                                 | 0 | 0 | 0 | 0 | 0 | 0 | 0 | 0                                                                 | 0 | 0 |
| MCO            | 0                                                         | 0 | 0 | 0 | 0 | 0 | 0 | 0 | 0 | 0  | 0                                                                                 | 0 | 0 | 0 | 0 | 0 | 0 | 0 | 0                                                                 | 0 | 0 |
| Child1         | 0                                                         | 0 | 0 | 0 | 0 | 0 | 0 | 0 | 0 | 0  | 0                                                                                 | 0 | 0 | 0 | 0 | 0 | 0 | 0 | 0                                                                 | 0 | 0 |
| C2             | 0                                                         | 0 | 0 | 0 | 0 | 0 | 0 | 0 | 0 | 0  | 0                                                                                 | 0 | 0 | 0 | 0 | 0 | 0 | 0 | 0                                                                 | 0 | 0 |
| C3             | 0                                                         | 0 | 0 | 0 | 0 | 0 | 0 | 0 | 0 | 0  | 0                                                                                 | 0 | 0 | 0 | 0 | 0 | 0 | 0 | 0                                                                 | 0 | 0 |
| C4             | 0                                                         | 0 | 0 | 0 | 0 | 0 | 0 | 0 | 0 | 0  | 0                                                                                 | 0 | 0 | 0 | 0 | 0 | 0 | 0 | 0                                                                 | 0 | 0 |
| C5             | 0                                                         | 0 | 0 | 0 | 0 | 0 | 0 | 0 | 0 | 0  | 0                                                                                 | 0 | 0 | 0 | 0 | 0 | 0 | 0 | 0                                                                 | 0 | 0 |
| C6             | 0                                                         | 0 | 0 | 0 | 0 | 0 | 0 | 0 | 0 | 0  | 0                                                                                 | 0 | 0 | 0 | 0 | 0 | 0 | 0 | 0                                                                 | 0 | 0 |
| C7             | 0                                                         | 0 | 0 | 0 | 0 | 0 | 0 | 0 | 0 | 0  | 0                                                                                 | 0 | 0 | 0 | 0 | 0 | 0 | 0 | 0                                                                 | 0 | 0 |
| C8             | 0                                                         | 0 | 0 | 0 | 0 | 0 | 0 | 0 | 0 | 0  | 0                                                                                 | 0 | 0 | 0 | 0 | 0 | 0 | 0 | 0                                                                 | 0 | 0 |
| C9             | 0                                                         | 0 | 0 | 0 | 0 | 0 | 0 | 0 | 0 | 0  | 0                                                                                 | 0 | 0 | 0 | 0 | 0 | 0 | 0 | 0                                                                 | 0 | 0 |
| C10            | 0                                                         | 0 | 0 | 0 | 0 | 0 | 0 | 0 | 0 | 0  | 0                                                                                 | 0 | 0 | 0 | 0 | 0 | 0 | 0 | 0                                                                 | 0 | 0 |
| TOTAL          |                                                           |   |   |   |   |   |   |   |   |    |                                                                                   |   |   |   |   |   |   |   |                                                                   |   |   |
| 6 to 15 TOTAL  |                                                           |   |   |   |   |   |   |   |   |    |                                                                                   |   |   |   |   |   |   |   |                                                                   |   |   |
| 0 to 5 TOTAL   |                                                           |   |   |   |   |   |   |   |   |    |                                                                                   |   |   |   |   |   |   |   |                                                                   |   |   |

|      |                                                                   | 1                | 2                                     | 3                                          | 4                        | 5                            | 6        |
|------|-------------------------------------------------------------------|------------------|---------------------------------------|--------------------------------------------|--------------------------|------------------------------|----------|
| Q44: | Where do you go to the toilet?                                    | Public Toilet    | Toilet in the compound                | Toilet in the house                        | Outside(No toilet)       | On paper or in a plastic bag | Not sure |
| Q45: | Is there a means for hand washing in the toilet/cubicle/location? | Yes              | No                                    |                                            |                          |                              |          |
| Q46: | Where did the water for hand washing come from?                   | Hands not washed | Took the water to the toilet location | Container near the toilet location         | Tap water from the house | Not sure                     |          |
| Q47: | Do you use soap for hand washing?                                 | Hands not washed | Soap not use – water only             | Soap not use – ash or other abrasive mat's | Soap & water             | Not sure                     |          |

|      |                                             |                     |                                            |                                              |                                |                                        |                           |
|------|---------------------------------------------|---------------------|--------------------------------------------|----------------------------------------------|--------------------------------|----------------------------------------|---------------------------|
| Q48: | Reason for not using soap:                  | Cost                | Unable to purchase in local store          | Prefer to use ash or other material          | Not sure that soap is required |                                        |                           |
| Q49: | Where do you wash your clothes?             | Clothes not washed  | In river/water source more than 500 meters | In river/water source closer than 500 meters | At well more than 500 meters   | At well closer than 500 meters         | At home                   |
| Q50: | Where do you hang your clothes to dry?      | Do not hung clothes | In fence around the house                  | In a tree                                    | Outside on a line              | House windows                          | Inside the house          |
| Q51: | How do you clean your teeth?                | Do not clean teeth  | Rinse with water                           | Use salt and water                           | Use herbal mouth wash          | Tooth brush only                       | Tooth brush & tooth paste |
| Q52: | How do you dispose dog or animal excrement? | No disposal         | In paper/plastic bag                       | Sweep it away/burn it                        | Bury it                        | No dogs/animals allowed inside or yard |                           |

Now I'd like to ask you some questions about your food and drink.

|      |                                                                                      |                |                                      |                                        |                                   |                             |                                          |
|------|--------------------------------------------------------------------------------------|----------------|--------------------------------------|----------------------------------------|-----------------------------------|-----------------------------|------------------------------------------|
| Q53: | How many meals do you usually eat in a normal day?                                   | One meal       | Two meals                            | Three meals                            | More than three meals             |                             |                                          |
| Q54: | How many times a week do you serve a meal containing vegetable?                      | zero           | 1 - 5 times a week                   | 6 - 10 times a week                    | 11 - 15 times a week              | 16 - 21 times a week        |                                          |
| Q55: | How many times a week do you serve viand? (Or meal containing meat, chicken or fish) | zero           | 1 - 5 times a week                   | 6 - 10 times a week                    | 11 - 15 times a week              | 16 - 21 times a week        |                                          |
| Q56: | Total pesos spent by family on junk food per day?                                    | 0 - 10 Pesos   | 11 - 20 pesos                        | 21- 30 pesos                           | 31 - 40 pesos                     | 41 - 50 pesos               |                                          |
| Q57: | How often do you feel hungry at the end of the day?                                  | Everyday       | Several days a week                  | Once a week                            | Once a month                      | Rarely                      |                                          |
| Q58: | Do you do anything to make your water safer to drink?                                | No action      | Buy drinking water (bottled, ATM)    | Use water filter (ex: bio-sand)        | Solar disinfection                | Boiling of water            | Other method to make water safe to drink |
| Q59: | How do you store water for cooking or drinking?                                      | No storage     | Bucket or similar container - no lid | Bucket or similar container - with lid | Earthen wear or plastic jug w/lid | Container from water vendor | From the tap in the house                |
| Q60: | How far is your main water supply from your home?                                    | 0 to 20 meters | 21 to 50 meters                      | 51 to 100 meters                       | 101 to 500 meters                 | 500+ meters                 |                                          |

I'd like to ask you some questions about your Income & occupation.

| Line/ID Number | Q61: What is the type of work of each person? |                         |        |         |            |              |                  |        |         | Q62: How much did each person earn from regular work/petty jobs/occasional work in the past month? | Q63: What was the approximate value of any product produced by each person during the past month? (Example: veg., detergent, snack, etc.) | Q64: How much did each person receive in assistance from friends or relatives in the past month? (include overseas remittances and gifts from nearby friends, but exclude gifts from mother to son within the family group below) | Q65: How much cash or value did each person receive from any other source in the past month? |  |                  |
|----------------|-----------------------------------------------|-------------------------|--------|---------|------------|--------------|------------------|--------|---------|----------------------------------------------------------------------------------------------------|-------------------------------------------------------------------------------------------------------------------------------------------|-----------------------------------------------------------------------------------------------------------------------------------------------------------------------------------------------------------------------------------|----------------------------------------------------------------------------------------------|--|------------------|
|                | Fisherman                                     | Tricycle/Triskid driver | Farmer | Lambury | Buy & sell | Construction | Household helper | Others | No work |                                                                                                    |                                                                                                                                           |                                                                                                                                                                                                                                   |                                                                                              |  |                  |
|                | 1                                             | 2                       | 3      | 4       | 5          | 6            | 7                | 8      | 9       |                                                                                                    |                                                                                                                                           |                                                                                                                                                                                                                                   |                                                                                              |  |                  |
| Adult1         | O                                             | O                       | O      | O       | O          | O            | O                | O      | O       |                                                                                                    |                                                                                                                                           |                                                                                                                                                                                                                                   |                                                                                              |  |                  |
| A2             | O                                             | O                       | O      | O       | O          | O            | O                | O      | O       |                                                                                                    |                                                                                                                                           |                                                                                                                                                                                                                                   |                                                                                              |  | Recipient Income |
| A3             | O                                             | O                       | O      | O       | O          | O            | O                | O      | O       |                                                                                                    |                                                                                                                                           |                                                                                                                                                                                                                                   |                                                                                              |  |                  |
| A4             | O                                             | O                       | O      | O       | O          | O            | O                | O      | O       |                                                                                                    |                                                                                                                                           |                                                                                                                                                                                                                                   |                                                                                              |  |                  |
| A5             | O                                             | O                       | O      | O       | O          | O            | O                | O      | O       |                                                                                                    |                                                                                                                                           |                                                                                                                                                                                                                                   |                                                                                              |  |                  |
| A6             | O                                             | O                       | O      | O       | O          | O            | O                | O      | O       |                                                                                                    |                                                                                                                                           |                                                                                                                                                                                                                                   |                                                                                              |  |                  |
| A7             | O                                             | O                       | O      | O       | O          | O            | O                | O      | O       |                                                                                                    |                                                                                                                                           |                                                                                                                                                                                                                                   |                                                                                              |  |                  |
| A8             | O                                             | O                       | O      | O       | O          | O            | O                | O      | O       |                                                                                                    |                                                                                                                                           |                                                                                                                                                                                                                                   |                                                                                              |  | Total HH income  |
| Column Total   |                                               |                         |        |         |            |              |                  |        |         |                                                                                                    |                                                                                                                                           |                                                                                                                                                                                                                                   |                                                                                              |  |                  |

|      |                                                                                                   | 1                         | 2                                    | 3                                           | 4                 | 5      |
|------|---------------------------------------------------------------------------------------------------|---------------------------|--------------------------------------|---------------------------------------------|-------------------|--------|
| Q66: | Compared to the rest of the year, do you feel that your household income over the past month was: | Above average             | Average                              | Below average                               |                   |        |
| Q67: | Has anyone in the household made a family budget before?                                          | Yes                       | No                                   |                                             |                   |        |
| Q68: | Does anyone in the household owe anyone money? If yes, how much?: _____                           | Yes                       | No                                   |                                             |                   |        |
| Q69: | Does anyone in the household have any savings? If yes, how much?: _____                           | Yes                       | No                                   |                                             |                   |        |
| Q70: | Do you have a vegetable garden?                                                                   | Yes                       | No                                   |                                             |                   |        |
| Q71: | If yes to Q70, how many vegetable plants are there in your garden?                                | 1-10                      | 11-20                                | 21-50                                       | 51-100            | 101 +  |
| Q72: | Does anyone in the household operate a small business?                                            | Yes                       | No                                   |                                             |                   |        |
| Q73: | If yes to Q72, check all that apply.                                                              | Vegetables or Seedlings   | Vermi or Vermicast                   | Food & Snacks                               | Cleaning Products | Others |
| Q74: | Is the housing structure extremely poor and in need of emergency renovations?                     | Yes                       | No                                   |                                             |                   |        |
| Q75: | If yes to Q74, select the box that best describes the poor condition of the house.                | Habitable (needs few fix) | Dilapidated (some parts are falling) | Totally damage (could collapse at any time) |                   |        |

(Fill in the following table based on your observations. Do not ask the recipient.)

| Indicator                        | Description and Corresponding Score                                                                                      | Score |
|----------------------------------|--------------------------------------------------------------------------------------------------------------------------|-------|
| Q76: Building Size               | Big: >25 sqm. (4)   Medium: 10-15 sqm. (2)   Small: <15 sqm. (0)                                                         |       |
| Q77: Foundation Structure        | Concrete/Firm (4)   Bamboo/Moderate (2)   Dirt/Weak (0)                                                                  |       |
| Q78: Roof Materials              | New GI Sheet (2)   Old GI Sheet/New Nipa (1)   Scrap/Old Nipa (0)                                                        |       |
| Q79: Wall Materials              | Concrete (4)   Wood (3)   Lawnanit/Plywood (2)   Bamboo (1)   Scrap (0)                                                  |       |
| Q80: Land (Ask)                  | Own/Inherited (4)   Mortgage (2)   Renting (1)   Tenant/Squatting (0)                                                    |       |
| Q81: House Materials (Ask)       | Own/Inherited (4)   Mortgage (2)   Renting (1)   Tenant/Squatting (0)                                                    |       |
| Q82: Duration of Residence (Ask) | 5 years & above (5)   1 years to 4 years (3)   below 1 year (1)                                                          |       |
| Q83: Water Supply (Ask)          | Faucet (grip) at home or own deep well (2)   Shared deep well or faucet within 50 meters (1)   None within 50 meters (0) |       |
| Q84: Electricity (Ask)           | Own meter (2)   Shared meter (1)   None (0)                                                                              |       |
| Q85: Fuel (Ask)                  | LPG/Electricity for cooking (3)   Kerosene (2)   Charcoal/Wood (0)                                                       |       |
| Q86: Toilet (Ask)                | Flush in home (3)   Manual in home (2)   Pit/Shared/Communal (1)   None (0)                                              |       |
| Q87: Furniture                   | Wood/Steel/Plastic [New] (2)   Old/Used Furniture (1)   None (0)                                                         |       |
| Q88: Appliances                  | 1 point per working appliance: (Example: TV, Stereo, Radio, Stove)                                                       |       |
| Q89: Car/Vehicle (Ask)           | Jeep/Car (6)   Motorcycle/Tricycle (4)   Trisikad (3)   Bicycle (2)   None (0)                                           |       |
| <b>Total Poverty Score:</b>      |                                                                                                                          |       |

## Appendix 2. MCO M&E data collection template

This is the monitoring and evaluation (M&E) template (two pages) used to collect regular metrics during the implementation of MCO. The ICM team responsible for implementing each MCO program would fill these templates in, under the supervision of ICM's national office.

| MALNOURISHED CHILDRENS OUTREACH PROGRAM DATA |           |                 |           |               |              |              |                          |                  |             |             |                           |                  |     |     |       |       |     |
|----------------------------------------------|-----------|-----------------|-----------|---------------|--------------|--------------|--------------------------|------------------|-------------|-------------|---------------------------|------------------|-----|-----|-------|-------|-----|
|                                              |           | PROGRAM DETAILS |           |               |              |              |                          | PRE-PROGRAM DATA |             |             |                           | MID-PROGRAM DATA |     |     |       |       |     |
| ID                                           | Base      | Name of Child   | Sex (M/F) | Date of birth | Age (months) | Feeding site | Referral source (B or C) | Date             | Weight (kg) | Height (cm) | Weight-for-height Z score | WHZ              | HAZ | FEB | MARCH | APRIL | MAY |
| 1                                            | Dumaguete |                 |           |               |              |              |                          |                  |             |             |                           |                  |     |     |       |       |     |
| 2                                            | Dumaguete |                 |           |               |              |              |                          |                  |             |             |                           |                  |     |     |       |       |     |
| 3                                            | Dumaguete |                 |           |               |              |              |                          |                  |             |             |                           |                  |     |     |       |       |     |
| 4                                            | Dumaguete |                 |           |               |              |              |                          |                  |             |             |                           |                  |     |     |       |       |     |
| 5                                            | Dumaguete |                 |           |               |              |              |                          |                  |             |             |                           |                  |     |     |       |       |     |
| 6                                            | Dumaguete |                 |           |               |              |              |                          |                  |             |             |                           |                  |     |     |       |       |     |
| 7                                            | Dumaguete |                 |           |               |              |              |                          |                  |             |             |                           |                  |     |     |       |       |     |
| 8                                            | Dumaguete |                 |           |               |              |              |                          |                  |             |             |                           |                  |     |     |       |       |     |
| 9                                            | Dumaguete |                 |           |               |              |              |                          |                  |             |             |                           |                  |     |     |       |       |     |
| 10                                           | Dumaguete |                 |           |               |              |              |                          |                  |             |             |                           |                  |     |     |       |       |     |
| 11                                           | Dumaguete |                 |           |               |              |              |                          |                  |             |             |                           |                  |     |     |       |       |     |
| 12                                           | Dumaguete |                 |           |               |              |              |                          |                  |             |             |                           |                  |     |     |       |       |     |
| 13                                           | Dumaguete |                 |           |               |              |              |                          |                  |             |             |                           |                  |     |     |       |       |     |
| 14                                           | Dumaguete |                 |           |               |              |              |                          |                  |             |             |                           |                  |     |     |       |       |     |
| 15                                           | Dumaguete |                 |           |               |              |              |                          |                  |             |             |                           |                  |     |     |       |       |     |
| 16                                           | Dumaguete |                 |           |               |              |              |                          |                  |             |             |                           |                  |     |     |       |       |     |
| 17                                           | Dumaguete |                 |           |               |              |              |                          |                  |             |             |                           |                  |     |     |       |       |     |
| 18                                           | Dumaguete |                 |           |               |              |              |                          |                  |             |             |                           |                  |     |     |       |       |     |
| 19                                           | Dumaguete |                 |           |               |              |              |                          |                  |             |             |                           |                  |     |     |       |       |     |
| 20                                           | Dumaguete |                 |           |               |              |              |                          |                  |             |             |                           |                  |     |     |       |       |     |
| 21                                           | Dumaguete |                 |           |               |              |              |                          |                  |             |             |                           |                  |     |     |       |       |     |
| 22                                           | Dumaguete |                 |           |               |              |              |                          |                  |             |             |                           |                  |     |     |       |       |     |
| 23                                           | Dumaguete |                 |           |               |              |              |                          |                  |             |             |                           |                  |     |     |       |       |     |
| 24                                           | Dumaguete |                 |           |               |              |              |                          |                  |             |             |                           |                  |     |     |       |       |     |
| 25                                           | Dumaguete |                 |           |               |              |              |                          |                  |             |             |                           |                  |     |     |       |       |     |

| ID | END PROGRAM DATA |             |             |                         |     |     |                  |               | RISK MANAGEMENT                         |                                      |             |                             |                      | ATTENDANCE                      |                                    | FOLLOW UP PROGRAM DATA (6 months post MCO) |             |             |                           |
|----|------------------|-------------|-------------|-------------------------|-----|-----|------------------|---------------|-----------------------------------------|--------------------------------------|-------------|-----------------------------|----------------------|---------------------------------|------------------------------------|--------------------------------------------|-------------|-------------|---------------------------|
|    | Date             | Weight (cm) | Height (cm) | Weight-for-height score | WHZ | HAZ | Weight gain (kg) | % weight gain | Dewormed as per protocol? (I or L or N) | Vit A as per protocol? (I or L or N) | Edema (y/n) | Health record warning (y/n) | Referred to RM (y/n) | No. days child attended feeding | No. days guardian attended feeding | No. mths post feeding                      | Height (cm) | Weight (kg) | Weight-for-height Z score |
| 1  |                  |             |             |                         |     |     |                  |               |                                         |                                      |             |                             |                      |                                 |                                    |                                            |             |             |                           |
| 2  |                  |             |             |                         |     |     |                  |               |                                         |                                      |             |                             |                      |                                 |                                    |                                            |             |             |                           |
| 3  |                  |             |             |                         |     |     |                  |               |                                         |                                      |             |                             |                      |                                 |                                    |                                            |             |             |                           |
| 4  |                  |             |             |                         |     |     |                  |               |                                         |                                      |             |                             |                      |                                 |                                    |                                            |             |             |                           |
| 5  |                  |             |             |                         |     |     |                  |               |                                         |                                      |             |                             |                      |                                 |                                    |                                            |             |             |                           |
| 6  |                  |             |             |                         |     |     |                  |               |                                         |                                      |             |                             |                      |                                 |                                    |                                            |             |             |                           |
| 7  |                  |             |             |                         |     |     |                  |               |                                         |                                      |             |                             |                      |                                 |                                    |                                            |             |             |                           |
| 8  |                  |             |             |                         |     |     |                  |               |                                         |                                      |             |                             |                      |                                 |                                    |                                            |             |             |                           |
| 9  |                  |             |             |                         |     |     |                  |               |                                         |                                      |             |                             |                      |                                 |                                    |                                            |             |             |                           |
| 10 |                  |             |             |                         |     |     |                  |               |                                         |                                      |             |                             |                      |                                 |                                    |                                            |             |             |                           |
| 11 |                  |             |             |                         |     |     |                  |               |                                         |                                      |             |                             |                      |                                 |                                    |                                            |             |             |                           |
| 12 |                  |             |             |                         |     |     |                  |               |                                         |                                      |             |                             |                      |                                 |                                    |                                            |             |             |                           |
| 13 |                  |             |             |                         |     |     |                  |               |                                         |                                      |             |                             |                      |                                 |                                    |                                            |             |             |                           |
| 14 |                  |             |             |                         |     |     |                  |               |                                         |                                      |             |                             |                      |                                 |                                    |                                            |             |             |                           |
| 15 |                  |             |             |                         |     |     |                  |               |                                         |                                      |             |                             |                      |                                 |                                    |                                            |             |             |                           |
| 16 |                  |             |             |                         |     |     |                  |               |                                         |                                      |             |                             |                      |                                 |                                    |                                            |             |             |                           |
| 17 |                  |             |             |                         |     |     |                  |               |                                         |                                      |             |                             |                      |                                 |                                    |                                            |             |             |                           |
| 18 |                  |             |             |                         |     |     |                  |               |                                         |                                      |             |                             |                      |                                 |                                    |                                            |             |             |                           |
| 19 |                  |             |             |                         |     |     |                  |               |                                         |                                      |             |                             |                      |                                 |                                    |                                            |             |             |                           |
| 20 |                  |             |             |                         |     |     |                  |               |                                         |                                      |             |                             |                      |                                 |                                    |                                            |             |             |                           |
| 21 |                  |             |             |                         |     |     |                  |               |                                         |                                      |             |                             |                      |                                 |                                    |                                            |             |             |                           |
| 22 |                  |             |             |                         |     |     |                  |               |                                         |                                      |             |                             |                      |                                 |                                    |                                            |             |             |                           |
| 23 |                  |             |             |                         |     |     |                  |               |                                         |                                      |             |                             |                      |                                 |                                    |                                            |             |             |                           |
| 24 |                  |             |             |                         |     |     |                  |               |                                         |                                      |             |                             |                      |                                 |                                    |                                            |             |             |                           |
| 25 |                  |             |             |                         |     |     |                  |               |                                         |                                      |             |                             |                      |                                 |                                    |                                            |             |             |                           |



### Appendix 3. Supplementary Statistical Methods

In this study, we adopted and revised the measure for *intensity* of poverty, or *A*, as defined in the Alkire-Foster Method for measuring multi-dimensional poverty.[1] *Intensity* of poverty is defined as the average proportion of indicators in which a household is deprived in, and a household is categorized as ‘experiencing poverty’ if they are deprived in at least one third of the weighted indicators. One important feature of *A* is the ability to quantitatively estimate poverty at the household level, and therefore include in model building. In this study, *A* was developed from 13 weighted indicators available from the ICM household survey. The indicators used were the household’s building size, foundation material, roof material, wall material, water supply, electricity, type of toilet, ownership of appliances, furniture, cars/vehicles, household head’s literacy, and household food security. To develop weights for each indicator, Principal Component Analysis (PCA) was first utilized to develop the factor structure, after which Confirmatory Factor Analysis (CFA) was applied to the structure for model building. All model indices for *A* were found to be acceptable, CFI and NNFI were greater than 0.9 and RMSEA was below 0.05 as per the Alkire-Foster Method. Weights were finalized by taking the mean of bootstrapped communalities for each indicator. Further analysis showed that *A* weighed according to the CFA was more informative to the finalized models when compared to an equally weighted *A*.

For the linear outcome, model building started with an intercept-only model:

$$Y_{ij} = \gamma_{00} + u_{0j} + e_{ij}$$

and intraclass correlation (ICC) was calculated by:

$$ICC = \frac{\sigma_{u_0}^2}{\sigma_{u_0}^2 + \sigma_e^2}$$

where  $\sigma_{u_0}^2$  is the variance of the community-level residuals  $u_{0j}$ , and  $\sigma_e^2$  is the variance of the individual-level residuals  $e_{ij}$ . Models were fitted with lower-level independent variables, excluding variables not significant according to t-tests. A community-level variable,  $Z_j$  was tested and included only if the deviance difference test was significant. Following this step, community-level residuals of the slope were systematically tested to determine the model with lowest deviance. Finally, interaction terms between lower and higher level variables were tested and included according to significance and model convergence.

The model building for the logistic outcome was similar, except for a few key steps. First, ICC was calculated by:

$$ICC = \frac{\sigma_{u_0}^2}{\sigma_{u_0}^2 + 3.29}$$

where 3.29 is the variance of a logistic distribution with scale factor 1 (with  $\pi \approx 3.14$ ). Second, the variables included in the final model were shown to only lower deviance in combination, but not individually. Random slopes of independent variables which were not significant in the model, but significant as slopes were included in the final model if found to contribute towards parsimony.

After following the specified steps, the two final mixed-effects models were:

*Linear (WHZ<sub>2</sub>)*

$$Y_{ij} = \gamma_{00} + \gamma_{10}X_{1ij} + \gamma_{20}X_{2ij} + \gamma_{30}X_{3ij} + \gamma_{40}X_{4ij} + \gamma_{50}X_{5ij} + \gamma_{60}X_{6ij} + \gamma_{01}Z_j \\ + \gamma_{31}X_{3ij}Z_j + u_{2j}X_{2ij} + u_{5j}X_{5ij} + u_{4j}X_{4ij} + u_{0j} + e_{ij}$$

*Logistic (dropout)*

$$\pi_{ij} = \text{logistic}(\eta_{ij}) \\ \eta_{ij} = \gamma_{00} + \gamma_{10}X_{1ij} + \gamma_{30}X_{3ij} + \gamma_{40}X_{4ij} + \gamma_{80}X_{8ij} \\ + u_{1j}X_{1ij} + u_{3j}X_{3ij} + u_{4j}X_{4ij} + u_{7j}X_{7ij} + u_{8j}X_{8ij} + u_{0j}$$

All statistical analyses were performed in R (Version 3.2.3).[2] Full Maximum Likelihood (FML) was used to compare linear mixed-effects models. The default Laplace Approximation build in the package ‘lme4’[3] was used to compare logistic mixed-effects models in conjunction with the optimizer ‘mimqa’[4] set at 10,000 iterations.

## References

1. Alkire S, Roche JM, Ballon P, et al. Multidimensional poverty measurement and analysis. Oxford, UK: Oxford University Press 2015.
2. R Core Team. R: A language and environment for statistical computing. R package version 3.2.3 Vienna, Austria: R Foundation for Statistical Computing; 2013 [Available from: <http://www.R-project.org/>].
3. Bates D, Maechler M, Bolker B, et al. Fitting Linear Mixed Effects Models Using lme4. *Journal of Statistical Software* 2015;67(1):1-48.
4. Bates D, Mullen KM, Nash JC, et al. Derivative-free optimization algorithms by quadratic approximation [program]: CRAN, 2015.
